# Supplementary material for: One-pot synthesis of colloidal Cdx:CuInS2 quaternary quantum dots used as sensitizers in photovoltaic cells
Source: Royal Society of Chemistry journal article supplement (doi:10.1039/c5ra04275e), 2015-01-01
Supplement: c5ra04275e1.pdf [file c5ra04275e1.pdf]

# **One-pot synthesis of high-quality Cd:CuInS<sub>2</sub> quaternary quantum dots as sensitizers for photovoltaic cell**

Bin-Long Wu,<sup>a</sup> Hsi-Jung Chao,<sup>a</sup> Chih-Ping Chen,<sup>b</sup> Cheng-Hsien Yang,<sup>c</sup> Jia-Yaw  
Chang<sup>a\*</sup>

<sup>a</sup>Department of Chemical Engineering, National Taiwan University of Science and  
Technology

<sup>b</sup> Department of Materials Engineering, Ming Chi University of Technology

<sup>c</sup>ShiFeng Technology Co., Ltd.

E-mail: [jychang@mail.ntust.edu.tw](mailto:jychang@mail.ntust.edu.tw)

Supplementary Information

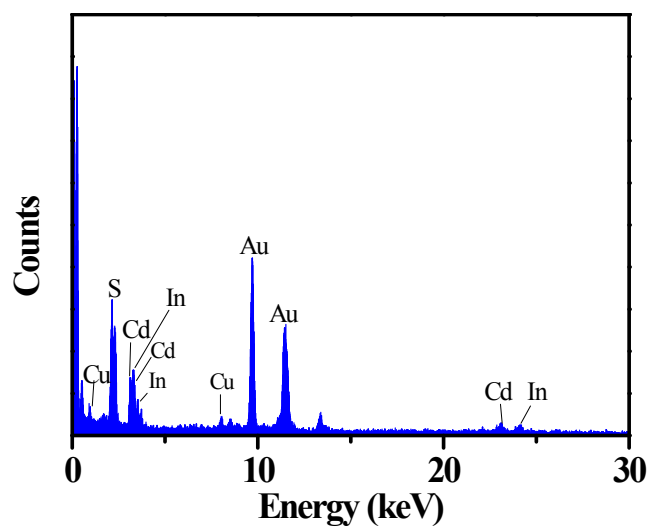

**Figure S1.** EDS spectra of Cd:CuInS<sub>2</sub> *q*-QDs. The Au signals are owing to the Au TEM grid.

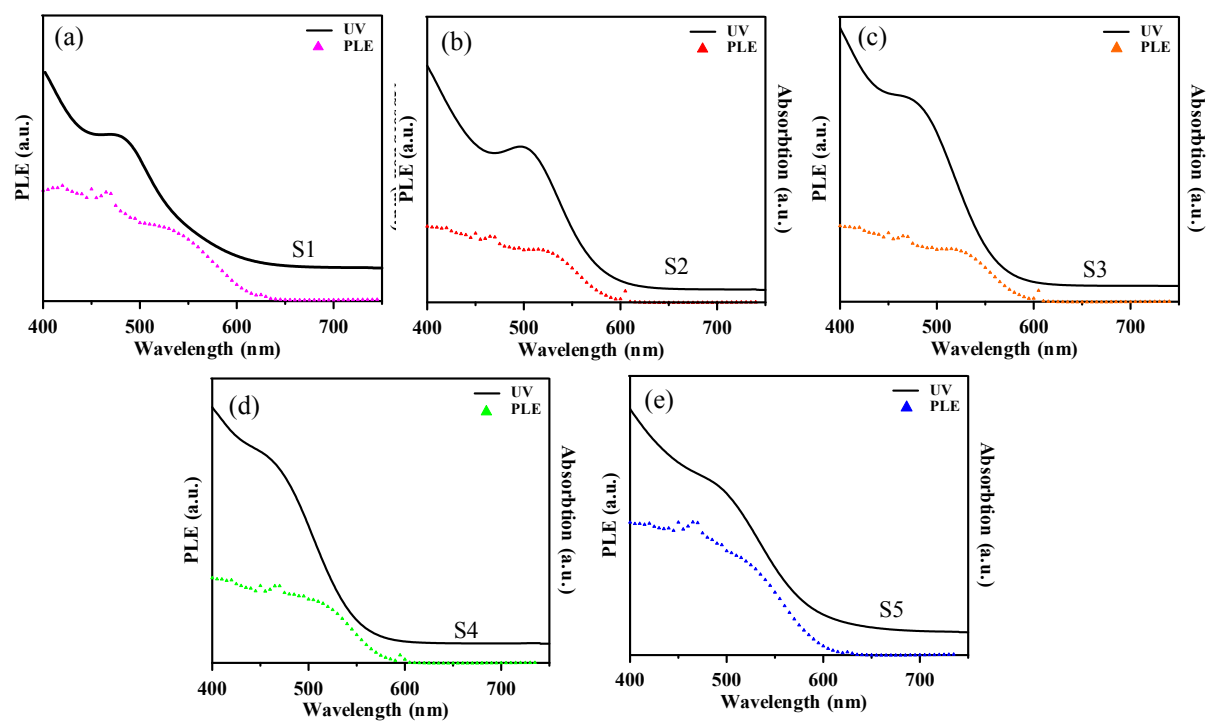

**Figure S2.** Comparison of the absorption (solid line) and photoluminescence emission (dot line) spectra of samples S1–S5.

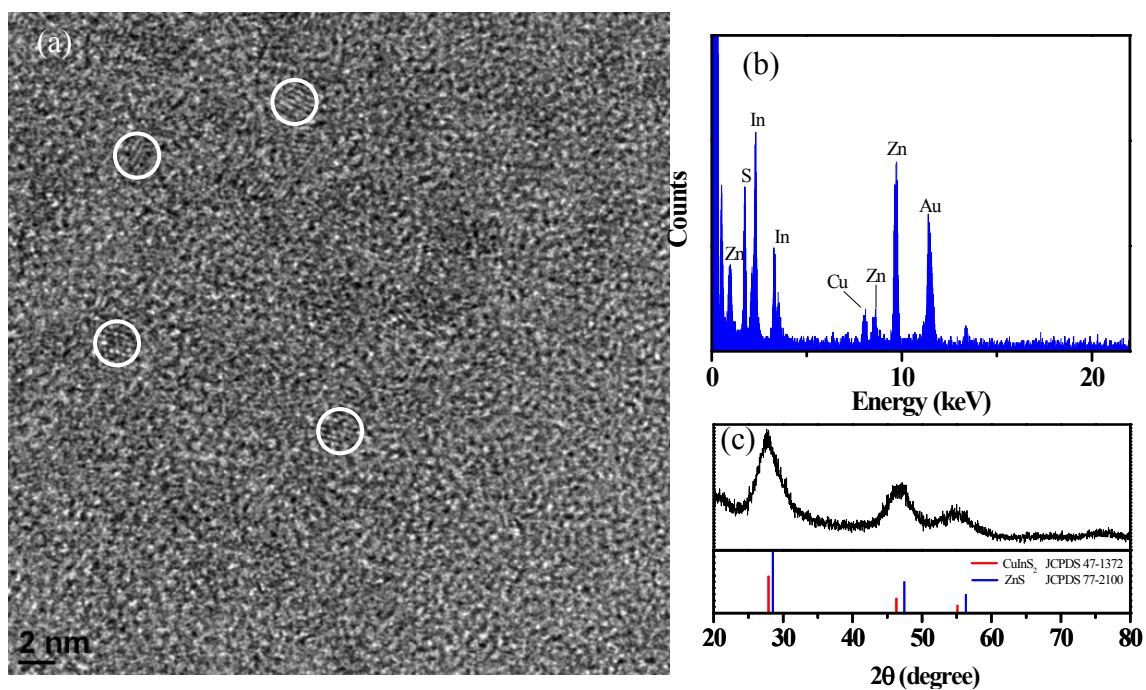

**Figure S3.** (a) HRTEM image, (b) EDS spectrum, and (c) XRD of Zn:CuInS<sub>2</sub> *q*-QDs. The white circles show the location of *q*-QDs. The Au signals are owing to the Au TEM grid.

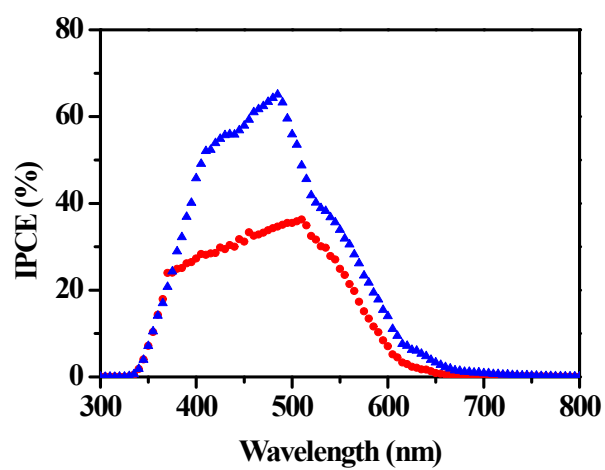

**Figure S4.** IPCE curves of Cd:CuInS<sub>2</sub>/CdS(3) (red dot) and Cd:CuInS<sub>2</sub>/CdSe(4) (blue dot) based QDSSC.
